# Supplementary material for: Developmental plasticity of Arabidopsis hypocotyl is dependent on exocyst complex function
Source: PubMed Central journal article supplement (PMC6382343; doi:10.1093/jxb/erz005), 2019-01-14
Supplement: erz005_suppl_supplementary_figure_s1-s2_table_s1-s2.pdf [file erz005_suppl_supplementary_figure_s1-s2_table_s1-s2.pdf]

**Table S1.** Primers used for genotyping and mRNA level analysis of *sec15b-1* and *sec15b-2* mutant lines.

| Primer          | Sequence (5' – 3')               | Purpose                                          |
|-----------------|----------------------------------|--------------------------------------------------|
| SEC15BPROM-RP   | GTTGAATTCCTATGGTTTC<br>TAGAAAAC  | genotyping of SALK_130663<br>line                |
| SEC15BPROM-LP   | AAGCATCCGTTTCAGCGTT<br>GAC       | genotyping of SALK_130663<br>line                |
| LBNEW           | GAACAACACTCAACCCTAT<br>CTCGGGC   | genotyping of SALK_130663<br>line                |
| SEC15BRIK-RPBF  | TTGGATCCATATGCAATCG<br>TCGAAAGGA | genotyping of RATM15-<br>1183-1_H line           |
| SEC15BRIK-LPBIR | CAGTAAGAGATGATTAGCC<br>GTC       | genotyping of RATM15-<br>1183-1_H line           |
| DS52A           | TCCGTTCCGTTTTTCGTTTT<br>TTAC     | genotyping of RATM15-<br>1183-1_H line           |
| NPT_LP          | TCCGAGTACGTGCTCGCTC<br>GATGC     | primers specific to<br>kanamycin resistance gene |
| NPT_RP          | GCTTGGGTGGAGAGGCTAT<br>TCGGC     | primers specific to<br>kanamycin resistance gene |
| SEC15BRIK-RPBF  | TTGGATCCATATGCAATCG<br>TCGAAAGGA | mRNA level analysis                              |
| SEC15BRIK-LPBIR | CAGTAAGAGATGATTAGCC<br>GTC       | mRNA level analysis                              |
| ACT7-FWD        | GCCGATGGTGAGGATATTC<br>AGC       | mRNA level analysis                              |
| ACT7-REV        | GAAACTCACCACCACGAAC<br>CAG       | mRNA level analysis                              |

**Table S2. Formation of adventitious roots in etiolated seedlings upon transfer to light**

| Genotype          | Plants No | Roots from hypocotyl | Roots from collet | Roots from collet (%) |
|-------------------|-----------|----------------------|-------------------|-----------------------|
| WT <i>SEC15b</i>  | 42        | 51                   | 11                | 18                    |
| <i>sec15b</i>     | 56        | 6                    | 40                | 87                    |
| WT <i>EXO70A1</i> | 21        | 14                   | 1                 | 7                     |
| <i>exo70A1</i>    | 39        | 1                    | 28                | 97                    |

5-day-old etiolated seedlings were transferred to long day conditions and the presence of emerged adventitious roots was scored after 7 days. Sister WT segregants from the last backcross were evaluated for each genotype. For each gene, the mutation significantly affects adventive root location ( $\chi^2$  test with Benjamini-Hochberg correction for multiple testing  $p < 0.001$ ). The effect on overall adventitious root number is marginally significant for *sec15b* ( $\chi^2$  test with Benjamini-Hochberg correction  $p = 0.049$ ) and non-significant for *exo70A1*. GLMM analysis further confirmed that the distribution of adventitious roots is significantly affected by the genotype ( $p = 0.027$  for WT vs. *sec15b*,  $p = 0.007$  for WT vs. *exo70A1*), as well as by the location (collet vs. hypocotyl;  $p < 0.001$  for either genotype), and indicated significant interaction between genotype and location ( $p < 0.001$  for either genotype).

## Figure S1.

(A) Graphical visualization of *sec15b-1* and *sec15b-2* insertions in *SEC15B* gene and promoter region.

(B) RT-PCR confirmation of the absence of *SEC15B* mRNA in *sec15b-1* and *sec15b-2* mutant lines.

(A)

Chromosome 4, 1037194-1041693

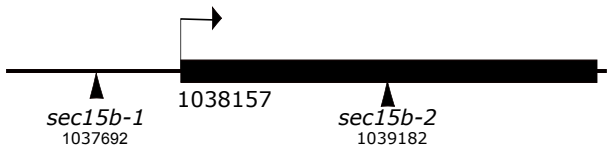

(B)

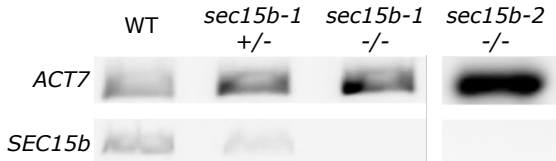

(A)

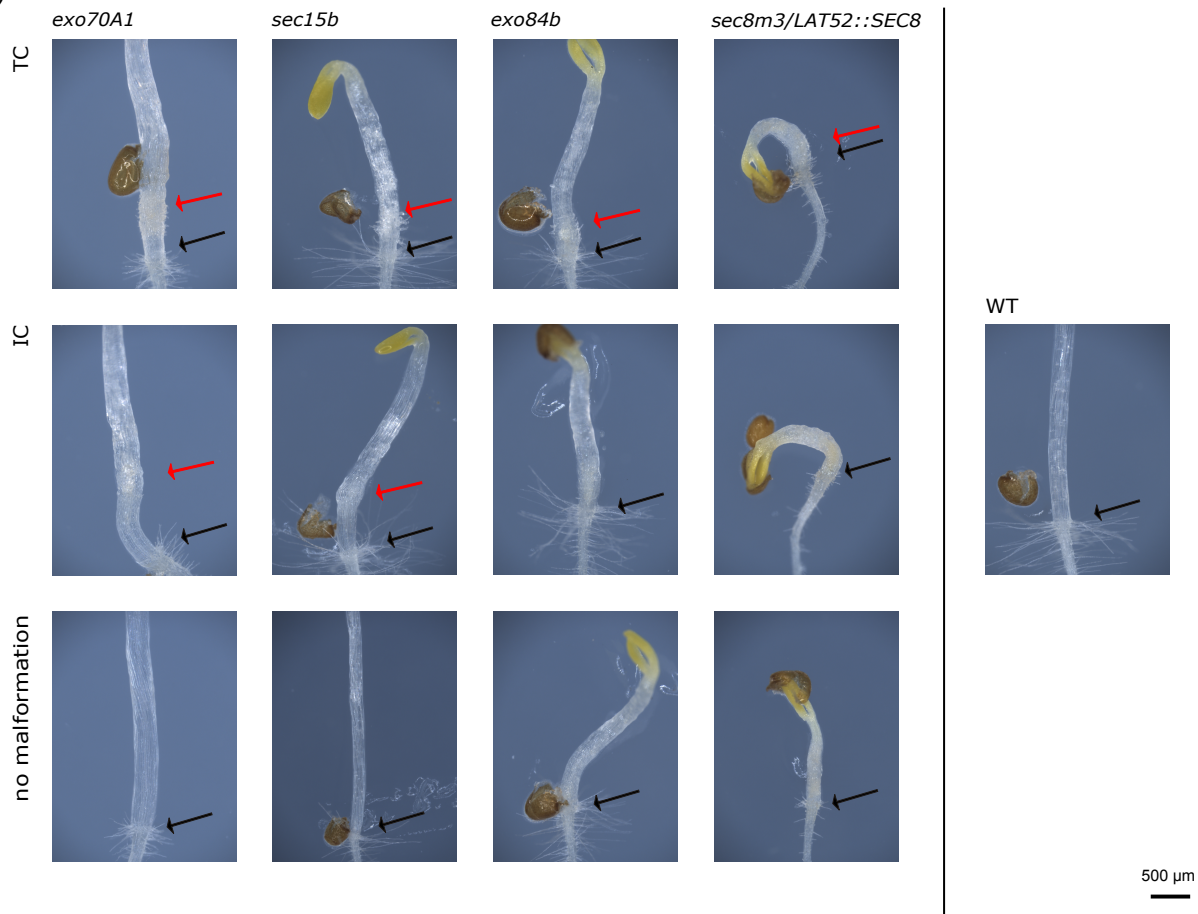

(B)

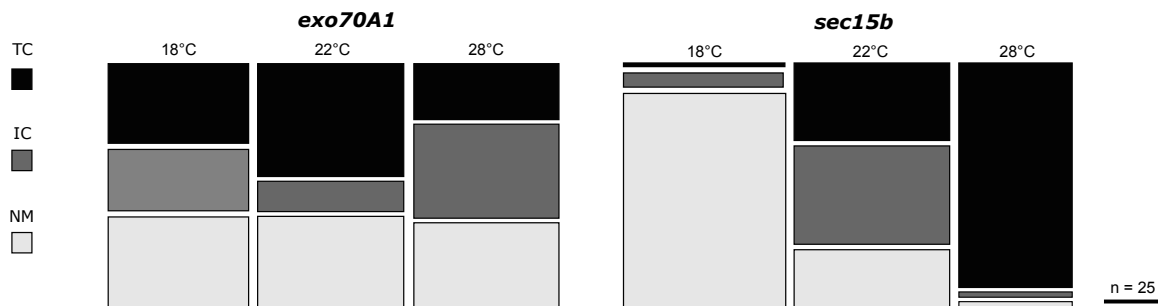

**Fig. S2. Phenotypic defects of etiolated hypocotyls in exocyst mutants.**

(A) Typical phenotypic deviations - ectopic collet-like structures with or without developed hairs (phenotypes TC and IC) and shortened hypocotyls without malformations in 5 days old *exo70A1*, *sec15b*, *exo84b* and *sec8m3/LAT52::SEC8* seedlings. Black arrows - collet hairs, red arrows - ectopic collet-like structures. A WT seedling is shown alongside for comparison. (B) Effect of cultivation temperature on the proportion of the phenotypic deviations in *exo70A1* and *sec15b* seedlings. Mosaic diagrams display fraction of individuals in the phenotypic categories among seedlings developed at the indicated temperature (NM – no malformation). In total 233 *exo70A1* and 452 *sec15b* mutant plants were evaluated; temperature effects were reproducibly highly significant only for the *sec15b* mutant (pairwise  $\chi^2$  test with Benjamini-Hochberg correction for multiple testing  $p \ll 0.001$  for each temperature combination). Column width reflects the number of seedlings counted. Data from one experiment are shown; similar results were obtained in 3 experiments. All seedlings were 5 days old. No hypocotyl defects were ever observed in WT seedlings under these culture conditions.
